# Supplementary material for: Deficiency in mTORC1-controlled C/EBPβ-mRNA translation improves metabolic health in mice
Source: PubMed Central journal article supplement — EMBO Rep. 2015 Jun 25;16(8):1022–36. doi: 10.15252/embr.201439837 (PMC4552494; doi:10.15252/embr.201439837), 2015-06-25
Supplement: embr0016-1022-sd2.pdf [file embr0016-1022-sd2.pdf]

Table EV1

## ENCODE CEBPB ChIP-Seq data

| Genes (lipogenesis)         | Position                  | Cell line                                  | rel. to start site | Associated with H3K27Ac |
|-----------------------------|---------------------------|--------------------------------------------|--------------------|-------------------------|
| <b>GLUT4 (SLC2A4)</b>       | chr17:7183906-7184169     | HeLa-S3                                    | - 885              | yes                     |
|                             | chr17:7186273-7186531     | HepG2                                      | +1477              | yes                     |
| <b>GLUT2 (SLC2A2 )</b>      | chr3:170746760-170747015  | HeLa-S3, IMR90                             | -2247              | yes                     |
| <b>CD36</b>                 | chr7:80014931-80015155    | HepG2                                      | +12602             | yes                     |
|                             | chr7:79991317-79991580    | HeLa-S3                                    | -7574              | no                      |
|                             | chr7:79986923-79987186    | HeLa-S3, HepG2, IMR90                      | -11968             | no                      |
|                             | chr7:79976114-79976369    | HeLa-S3, IMR90                             | -22777             | yes                     |
| <b>LPL</b>                  | chr8:19794465-19794728    | HeLa-S3                                    | -2117              | yes                     |
|                             | chr8:19785505-19785785    | H1-hESC, HeLa-S3, HepG2, IMR90, K562       | -11077             | no                      |
|                             | chr8:19795186-19795453    | A549, HeLa-S3, HepG2                       | -1396              | no                      |
|                             | chr8:19798729-19798992    | HeLa-S3                                    | +2147              | no                      |
| <b>SREBF1 (SREBP1c)</b>     | chr17:17744565-17744828   | HeLa-S3                                    | -4240              | yes                     |
|                             | chr17:17740616-17741053   | A549, H1-hESC, HepG2, HeLa-S3, IMR90, K562 | -291               | yes                     |
| <b>ACACA (ACC)</b>          | chr17:35715358-35715621   | HeLa-S3                                    | -701               | yes                     |
| <b>FASN</b>                 | chr17:80059893-80060157   | HeLa-S3, HepG2                             | -3787              | no                      |
|                             | chr17:80050128-80050403   | K562                                       | +5878              | no                      |
| <b>SCD</b>                  | chr10:102105322-102105585 | HeLa-S3                                    | -1450              | yes                     |
|                             | chr10:102108367-102108642 | HeLa-S3, HepG2, IMR90, K562                | +1595              | yes                     |
| <b>FABP4 (aP2)</b>          | chr8:82401083-82401338    | IMR90                                      | -5610              | yes                     |
| <b>LIPE (HSL)</b>           | chr19:42924218-42924473   | A549                                       | +4057              | yes                     |
| <b>PNPLA2 (ATGL)</b>        | chr11:818737-819012       | A549, HeLa-S3, HepG2, IMR90, K562          | -164               | yes                     |
| Genes ( $\beta$ -oxidation) | Position                  | Cell line                                  | rel. to start site | Associated with H3K27Ac |

|                     |                           |                                |        |     |
|---------------------|---------------------------|--------------------------------|--------|-----|
| <b>CD36</b>         | chr7:79927573-79927838    | HeLa-S3, IMR90                 | -71318 | no  |
|                     | chr7:79941534-79941789    | IMR90                          | -57357 | yes |
|                     | chr7:79959858-79960113    | IMR90                          | -39033 | yes |
|                     | chr7:80014931-80015155    | HepG2                          | +16040 | yes |
| <b>ACOX1 (AOX)</b>  | chr17:73979818-73980171   | K562                           | -4303  | yes |
|                     | chr17:73971975-73972198   | HepG2                          | +3540  | yes |
|                     | chr17:73972329-73972604   | K562, HepG2                    | +3186  | yes |
|                     | chr17:73976232-73976555   | K562                           | -717   | yes |
| <b>ACADL (LCAD)</b> | chr2:211086353-211086647  | H1-hESC, HeLa-S3, HepG2, IMR90 | +3862  | no  |
|                     | chr2:211091087-211091350  | HeLa-S3                        | -872   | no  |
|                     | chr2:211092494-211092742  | HepG2                          | -2279  | no  |
| <b>ACADM (MCAD)</b> | chr1:76191055-76191318    | HeLa-S3                        | +1012  | yes |
| <b>ACADS (SCAD)</b> | chr12:121165682-121165913 | HepG2                          | +2111  | no  |
|                     | chr12:121160658-121160933 | A549, HepG2, IMR90, K562       | -2913  | no  |
| <b>ACOX1 (AOX)</b>  | chr17:73979818-73980171   | K562                           | -4656  | yes |
|                     | chr17:73971975-73972198   | HepG2                          | +3317  | yes |
|                     | chr17:73972329-73972604   | HepG2, K562                    | +2911  | yes |
|                     | chr17:73976232-73976555   | K562                           | -1040  | yes |
| <b>ACADL (LCAD)</b> | chr2:211086353-211086647  | H1-hESC, HeLa-S3, HepG2, IMR90 | +3568  | no  |
|                     | chr2:211091087-211091350  | HeLa-S3                        | -1135  | no  |
|                     | chr2:211092494-211092742  | HepG2                          | -2527  | yes |
| <b>ACADM (MCAD)</b> | chr1:76191055-76191318    | HeLa-S3                        | +1275  | yes |
| <b>ACADS (SCAD)</b> | chr12:121165682-121165913 | HepG2                          | +2111  | no  |

Data are derived from <http://genome.ucsc.edu/ENCODE/>
